# Supplementary material for: Knowledge and Perceptions of Pest Ants in a Tropical Context
Source: Research Square preprint supplement (doi:10.21203/rs.3.rs-8371016/v1), 2025-12-18
Supplement: Supplementary file 1 [file 65d700bd11b159ec6e4431a6.docx]

**Supplementary Tables**

**S1:** On-site ant species monitoring and qualitative interviews for seven sites in Sabah, one site in Singapore, and four sites in peninsular Malaysia.

| **Research areas** | **Site type** | **Interview transcripts** | **Ants ID by YSH & AI** |
| --- | --- | --- | --- |
| Kawang Forest Reserve | Rural | Ants are not a problem; no complaints from tourists, but he is aware of the new ant species described from Kawang recently. | - |
| Kawang Forest Reserve | Rural | Ants are a problem in his orchard, particularly in the evening. The problematic ant is what he called Semut Api (Fire Ant). He will kill these ants if he encounters them in the orchard with insect sprays or flames from camping gas cylinders. | *Leptogenys* *spp.* |
| Kawang Forest Reserve | Rural | Red fire ant, he won't kill because, although the bites are painful, they're not poisonous. | *Oecophylla smaragdina* |
| Kawang Forest Reserve | Rural | Small ants in the kitchen are also a problem. These species he will kill as well, with insect sprays. | - |
| Kawang Forest Reserve | Rural | Black medium ants that build nests in the wooden wall cavities will be killed as well, because he said the excretions (kencing=pee) from these ants will accelerate wood rotting, thereby affecting the structure of the house. Primarily active at night. | Suspected *Camponotus spp.* |
| Papar town (Bakuteh Marahang) | Rural | Ants are a problem in the kitchen. Black ants that run very fast were their description. This place is only six months old and still looks new. She manages the ants by cleaning the kitchen surface with dishwashing soap. | *Paratrechina longicornis* |
| Kawang Forest Reserve | Rural | Ants problem on the floor of beds rooms. Yellow ants that run very fast. | *Anoplolepis gracilipes* |
| GKC School | Rural | She says there are few ants around. It is a problem when inside the house. Because they take the sugar.  Asked about fire ants. Not many fire ants in the school. | Near the sink found: *Paratrechina longicornis, Monomorium floricola, Tapinoma melanocephalum* |
| GKC School | Rural | He has a farm growing vegetables. He doesn't think ants are a problem |  |
| Kg. Kiau Nuluh | Rural | Ants are a problem in the houses in Kiau-Nuluh village, where entomology officers, guides, and rangers work at Kinabalu HQ. Black fire ants are more of a problem in the orchard and garden. Inside the house, the ants that cause problems are mostly attracted to food. Hence, the villagers manage by changing the food placement. However, if these ants were found elsewhere in the house (not the kitchen), they would be killed with insect spray. | *Leptogenys spp.* |
| Kg. Kiau Nuluh | Rural | She reported that an ant species (yellow, small ants) that used to be very common in the 90s inside the house is no longer found there. The Dusun name for these ants is Sodom. He said Sodom is still common in the house at his village in Tambunan. | Suspected  *Nylanderia spp.* |
| Kg. Kiau Nuluh | Rural | The Black Medium ants that he reported were also a problem. The Dusun name for this ant species is Tobohung. The time of activity is also more active in night. | Suspected  *Camponotus spp.* |
| Kg. Kiau Nuluh | Rural | She reported that a recent ant species that used to be found only in forest trees is now entering the house. These ants are more night active, and the Dusun name for this species is Bukut. |  |
| KK Wetlands | Urban Park | He has noticed weaver ants on the rails of the mangrove area. Not aware of any fire ant. They do not think ants are a problem. | From baits: *Monomorium floricola, Oecophylla smaragdina, Paratrechina longicornis, Tetramorium, Cardicondyla nana.*  Absent: A*noplolepsis gracilipies* |
| KK Wetlands | Urban Park | Ants are not a problem; termites are. | - |
| Double Six Memorial Park | Urban Park | Ants are not a problem there. No ants here, only in the forest. But he says he will try to avoid exposing food (attracting them) in the kitchen. He says that other people will use some white balls(napthalene=moth balls) and spray to kill them | - |
| Likas Bay Beach | Urban Park | Ants are considered a problem because they cause damage to tree roots by building nests in the soil near the roots. | *Solenopsis germinata* (red fire ants) are collected at the base of trees. Possibly, the DBKK staff is referring to fire ants as the species causing damage to the trees. |
| Likas Bay Beach | Urban Park | In relation to humans, ants are only a problem if someone accidentally steps on their nest or foraging trail. | - |
| Fort Canning- Singapore | Urban Park | Aware of ants. Weaver ants are a problem for them because they have a painful bite. They do not seem to actively remove them | *Oecophylla smaragdina* |
| Restaurant Masjid Felcra Sungai Ara | Rural | At the restaurant they have a weaver ant, which they do not like and try to remove. But they noticed that fruit trees with weaver ant have sweeter fruits. At home they have black medium sized ants and they will nest inside the house, they use a powder to get rid of them. | *Paratrechina longicornis, Oecophylla smaragdina* (at the back of the restaurant), *Camponotus parius* |
| Restaurant Masjid Felcra Sungai Ara | Rural | They recently moved to the restaurant so they are not concerned about ants yet. At their home they also have black ants and they will use spray as insecticide. | - |
| UM plantation (Kota Tinggi) | Rural | Ants present inside the buildings. They will spray insecticide when they see them. | Nearby the building the most abundant species are: *Anoplolepis gracilipies, monomorium floricola, Carebara spp, Camponotus parius* |
| UM Botanical Garden | Urban Park | Ants present, she thinks they are good because they clean up other insects and debris on the floor. However, when they have a school group, some might complain that they get bitten by fire ants. They also have other ants coming inside the herbarium, black ants. They do not spray any insecticide; they will kill them manually. They rarely fumigate because of the cost. | *Oecophylla smaragdina, Dolichoderus thoracicus* |
| Genting Tea Estate | Rural | A problem, when the setting is in his domicile because they will swarm food and nest in electrical connection and also a risk for my small kids because they will try to eat the ants or the ants could sting them. Apart from that, he sees them as a beneficial animal.  No pest control because the problem with ants is still at minimum level. No need for a professional yet. They kept nesting in different places every time he eradicated one nest. The solution at least for his situation is continuous effort baiting them with ant baits (Thoughts about invasive ants). They are difficult to deal with once they are big in numbers. The dominant invasive species tends to push out the native species and kill other insects too in their path. He nominate the yellow crazy ants as the most destructive invasive species that he have encountered. He also tells us that Genting Tea Estate was dominated by *Anoplolepis gracilipes* and two years ago there was a shift to *Dolicoderus thoracicus*.  Also, he tells us that in Malaysia everything will be called fire ant as long as they sting/bite. Thats the reason as fire ant is referred to multiple species (*Leptogenys*, *Oecophylla* or *Solenopsis*). | *Dolichoderus thoracicus* very dominant inside and outside the houses, *Anoplolepis gracilipes* found in small patches. |
| Genting Tea Estate | Rural | He is not concerned about ants unless they go to his sugar. He is aware of weaver ants, because they can be aggressive and annoying. More concerned about termites inside the house. He knows about fire ants and defines them as brown and red. He says that he found them in a lawn. | - |
| Mount Faber Park - Singapore) | Urban Park | (E-mail response)  1. Are you aware of ants? Yes  2. ⁠Are ants beneficial or a problem for you? Why? They are a minor problem when I need to measure tree girths as I sometimes get bitten. I would think native ants would be beneficial to the forest ecosystem besides that.  3. Do you think pest control would help manage the ants at your place? Why. I don’t think so as there are many ants in the forest of Mount Faber and it’ll be hard to target specific ant species when the whole park is quite large.  4. What challenges do you face with ants at your place, and what solutions have you tried or would suggest? Sometimes getting bitten by more aggressive ants. I will be more careful to avoid ant trails when I am working at the more forested areas of the park, wearing long sleeves/pants, and spraying bug repellent.  5. What do you think about invasive ants? Can you name or describe any that you know? Bad for local biodiversity and hard to control. I have heard about Fire Ants and Yellow Crazy Ants being invasive in Singapore. | Saw *Oecophylla smaradigna* at the edge of the forest and *Carebara diversa* inside the forest (potential aggressive ants that could bite her) |

**S2.** Overall themes and subthemes derived from the qualitative analysis

| **No** | **Theme** | **Subthemes** |
| --- | --- | --- |
| 1 | Ants as a context-dependent nuisance (especially indoors/kitchens) | indoors; kitchen; bedrooms; sugar; restaurant; buildings; electrical/nesting |
| 2 | Mixed perceptions: nuisance vs. beneficial roles | benefits acknowledged; tolerated outdoors |
| 3 | Common management tactics: hygiene, sprays, powders, baits, mothballs | hygiene; sprays; powders/baits; mothballs; manual kill |
| 4 | Species mentioned frequently (local names & identifications) | weaver ants; fire ants; black ants; yellow crazy ants; Camponotus; Paratrechina; Dolichoderus |
| 5 | Conflation of 'fire ants' as a lay label for multiple stinging species | label ambiguity; multiple taxa under one label |
| 6 | Health/safety and pain: bites noted but often not severe | painful but not poisonous; risk to children; nest disturbance |
| 7 | Structural/plant damage concerns in specific settings | wood rot; tree roots damage; electrical nesting |
| 8 | Temporal/activity patterns and habitat shifts | nocturnal activity; forest-to-house shift; historic change |
| 9 | Invasive/dominant species dynamics and turnover | dominance; turnover (species shift) |
| 10 | Termites sometimes overshadow ants as the bigger problem | termites priority |
| 11 | Preventive mindset: avoid attracting ants, adjust practices | food placement; avoid exposure; surface cleaning |
| 12 | Place-based variation (forest reserves, wetlands, restaurants, estates, homes) | protected areas; farms; restaurants; estates; homes/buildings |
